# Supplementary material for: Pathological and Epidemiological Characterization of First Outbreak of Daylily Rust in Europe and Evaluation of Puccinia hemerocallidis Resistance in Hemerocallis Cultivars
Source: MDPI journal article supplement (doi:10.3390/plants9040427), 2020-03-31
Supplement: s1 [file s1]

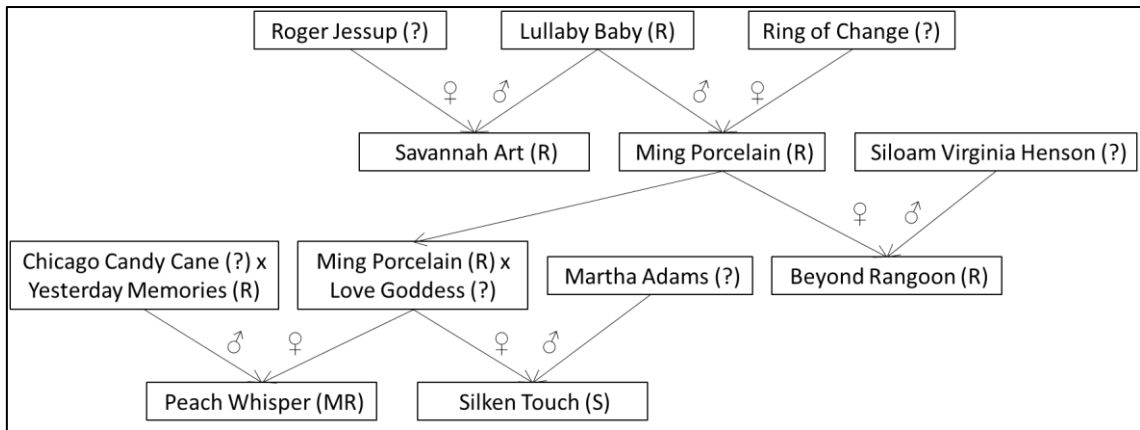

**Figure S1.** Genealogy of rust resistance related to daylily cultivars Lullaby Baby and Ming Porcelain. R, Resistant; MR, Moderately Resistant; S, Susceptible; ?, unknown; sdlg, seedling [1, 5, 19, 22, 23, 27, 28].

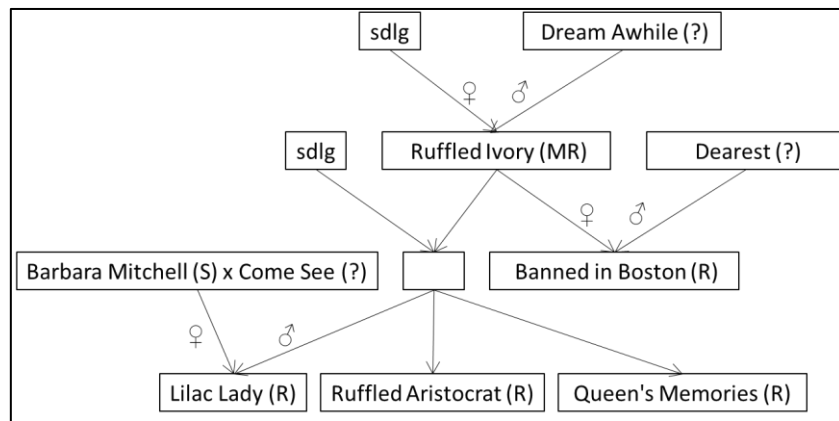

**Figure S2.** Genealogy of rust resistance related to daylily cultivar Ruffled Ivory. R, Resistant; MR, Moderately Resistant; S, Susceptible; ?, unknown; sdlg, seedling. [1, 5, 19, 22, 23, 27, 28].

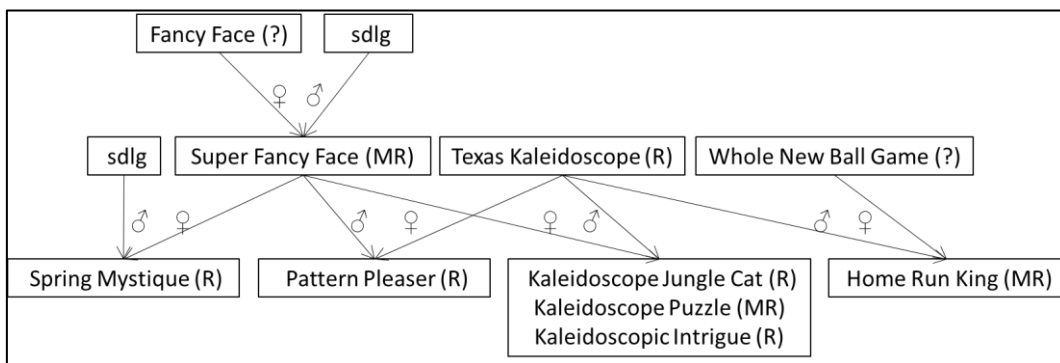

**Figure S3.** Genealogy of rust resistance related to daylily cultivars Super Fancy Face and Texas Kaleidoscope. R, Resistant; MR, Moderately Resistant; S, Susceptible; ?, unknown; sdlg, seedling. [1, 5, 19, 22, 23, 27, 28].

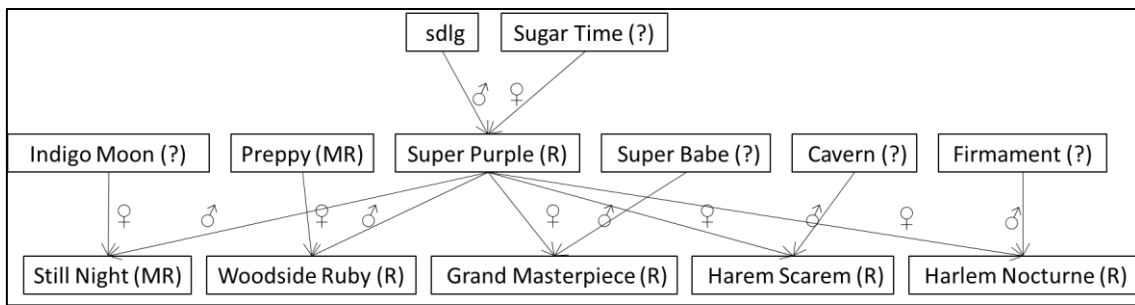

**Figure S4.** Genealogy of rust resistance related to daylily cultivar Super Purple. R, Resistant; MR, Moderately Resistant; S, Susceptible; ?, unknown; sdlg, seedling. [1, 5, 19, 22, 23, 27, 28].

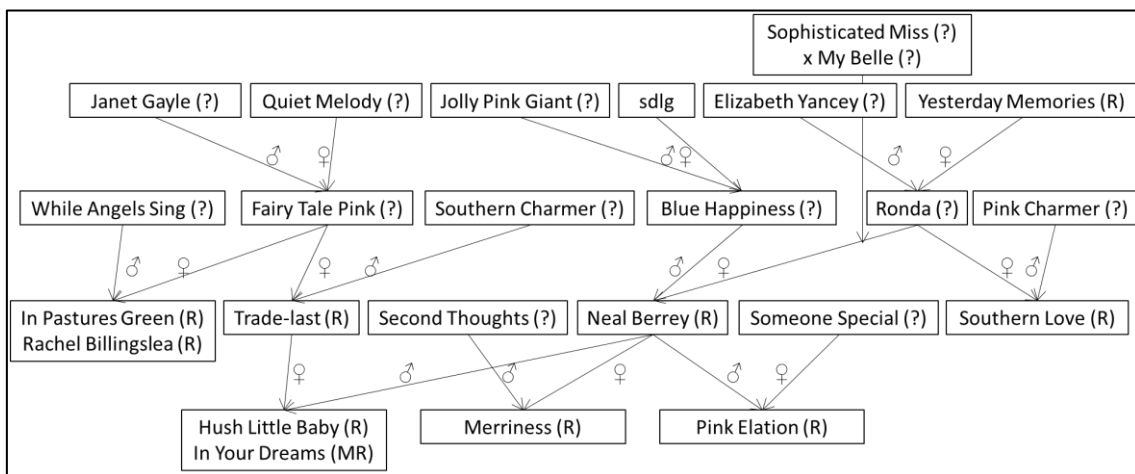

**Figure S5.** Genealogy of rust resistance related to daylily cultivars Fairy Tale Pink, Neal Berrey and Ronda. R, Resistant; MR, Moderately Resistant; S, Susceptible; ?, unknown; sdlg, seedling. [1, 5, 19, 22, 23, 27, 28].

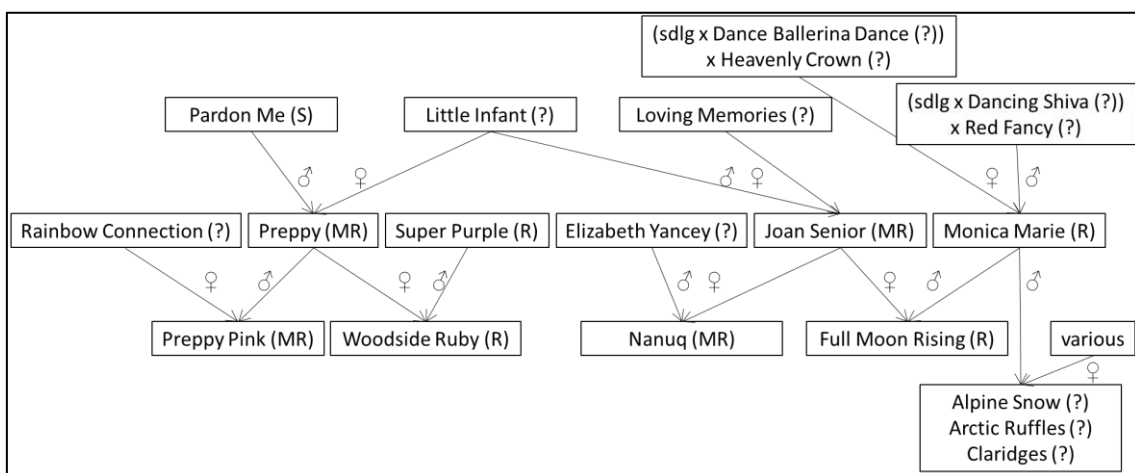

**Figure S6.** Genealogy of rust resistance related to daylily cultivars Little Infant, Preppy and Joan Senior. R, Resistant; MR, Moderately Resistant; S, Susceptible; ?, unknown; sdlg, seedling. [1, 5, 19, 22, 23, 27, 28].
